# Supplementary material
Source: PubMed Central journal article supplement (PMC6422346)
Supplement: NIHMS1516688-supplement-1.pdf [file NIHMS1516688-supplement-1.pdf]

**Appendix**  
**Life's Simple 7 and Peripheral Artery Disease: The Multi-Ethnic Study of Atherosclerosis**  
**Unkart et al.**

**Appendix Table 1.** Life's Simple 7 Individual Component Definitions

| <b>Component/Score</b>   | <b>Definition</b>                                                                      |
|--------------------------|----------------------------------------------------------------------------------------|
| <b>Smoking</b>           |                                                                                        |
| 0                        | Current                                                                                |
| 1                        | Former, quit $\leq 12$ months ago                                                      |
| 2                        | Never, quit $> 12$ months ago                                                          |
| <b>BMI</b>               |                                                                                        |
| 0                        | $\geq 30$ kg/m <sup>2</sup>                                                            |
| 1                        | 25.0–29.99 kg/m <sup>2</sup>                                                           |
| 2                        | $< 25.0$ kg/m <sup>2</sup>                                                             |
| <b>Physical activity</b> |                                                                                        |
| 0                        | No exercise                                                                            |
| 1                        | 1–149 minutes of moderate exercise or 1–74 minutes of vigorous exercise/week           |
| 2                        | $\geq 150$ minutes of moderate exercise or $\geq 75$ minutes of vigorous exercise/week |
| <b>Diet</b>              |                                                                                        |
| 0                        | 0–1 components of healthy diet                                                         |
| 1                        | 2–3 components of healthy diet                                                         |
| 2                        | 4–5 components of healthy diet                                                         |
| <b>Blood pressure</b>    |                                                                                        |
| 0                        | SBP $\geq 140$ mm Hg or DBP $\geq 90$ mm Hg                                            |
| 1                        | SBP 120–139 mm Hg or DBP 80–89 mm Hg or treated to $< 120/80$ mm Hg                    |
| 2                        | $< 120/80$ mm Hg, non-medicated                                                        |
| <b>Cholesterol</b>       |                                                                                        |
| 0                        | $\geq 240$ mg/dL                                                                       |
| 1                        | 200–239 mg/dL or treated to $< 200$ mg/dL                                              |
| 2                        | $< 200$ mg/dL, non-medicated                                                           |
| <b>Glucose</b>           |                                                                                        |
| 0                        | $\geq 126$ mg/dL fasting                                                               |
| 1                        | 100–125 mg/dL fasting or treated to $< 100$ mg/dL                                      |
| 2                        | $< 100$ mg/dL fasting, non-medicated                                                   |

*Notes:* Definitions for each of the individual components of the Life's Simple 7 metrics.

SBP, systolic blood pressure; DBP, diastolic blood pressure.

**Appendix**  
**Life's Simple 7 and Peripheral Artery Disease: The Multi-Ethnic Study of Atherosclerosis**  
**Unkart et al.**

**Appendix Table 2.** Associations of Life's Simple 7 Score With Incident PAD and Decline in ABI by Race/Ethnicity in MESA

| <b>Race/Ethnicity</b> | <b>Incident PAD cases<br/>n/N</b> | <b>Incident PAD<br/>HR (95% CI)</b> | <b>p-value</b>   | <b>ABI decline cases<br/>n/N</b> | <b>Decline in ABI<br/>OR (95% CI)</b> | <b>p-value</b> |
|-----------------------|-----------------------------------|-------------------------------------|------------------|----------------------------------|---------------------------------------|----------------|
| Non-Hispanic white    | 82/2,227                          | 0.76 (0.69, 0.85)                   | <b>&lt;0.001</b> | 168/1,760                        | 0.92 (0.84, 0.99)                     | <b>0.05</b>    |
| African American      | 105/1,414                         | 0.87 (0.78, 0.96)                   | <b>0.008</b>     | 136/1,081                        | 0.93 (0.85, 1.03)                     | 0.16           |
| Hispanic              | 46/1,194                          | 0.78 (0.67, 0.91)                   | <b>0.001</b>     | 81/897                           | 0.88 (0.78, 0.99)                     | <b>0.03</b>    |
| Chinese               | 18/694                            | 1.11 (0.85, 1.45)                   | 0.45             | 34/529                           | 0.98 (0.81, 1.21)                     | 0.91           |

*Notes:* Presented are the multiplicative interaction of the Life's Simple 7 overall score on a continuous scale with race/ethnic group for incident PAD (ABI  $\leq$  0.9 any time after Exam 1) and decline in ABI ( $\geq$  0.15 between Exam 1 (2002–2002) and Exam 5 (2010–2012)). Overall, *p*-for-interaction was 0.04 for incident PAD, and 0.76 for decline in ABI. Boldface indicates statistical significance ( $p \leq 0.05$ ).

PAD, peripheral artery disease; ABI, ankle brachial index; MESA, Multi-Ethnic Study of Atherosclerosis; HR, hazard ratio.
